# Supplementary material
Source: PubMed Central journal article supplement (PMC9814245)
Supplement: NIHMS1859420-supplement-1.pdf [file NIHMS1859420-supplement-1.pdf]

## **SUPPLEMENTAL TABLES & FIGURES**

### Supplemental Table 1. Complication Severity Definitions

#### Major

Acute / Chronic Respiratory Failure  
Bronchopulmonary Fistula  
Cardiac Arrest  
Cerebral Vascular Accident / Stroke  
Congestive Heart Failure  
Hemothorax  
Myocardial Infarction  
Respiratory Arrest  
Pulmonary Embolus / Emboli  
Wound Dehiscence

#### Intermediate

Blood Loss Requiring a Transfusion  
Cardiac Arrhythmia  
Fever Requiring Antibiotics  
Hospitalization  
Pain Requiring Referral to an Anesthesiologist / Pain Specialist  
Pneumothorax  
Rib Fracture(s)  
Vocal Cord Immobility / Paralysis  
Infection and Fever  
Pneumonia and Fever  
Infection  
Wound Infection  
Deep Venous Thrombosis (DVT)  
Hemoptysis  
Bleeding  
Pneumonia

#### Minor

Allergic Reaction  
Bronchospasm  
Atelectasis  
Hypotension / Vasovagal Reaction  
Hypokalemia  
Other Specify  
Urinary

## Supplemental Table 2. Complication Category Definitions

### Respiratory

Acute / Chronic Respiratory Failure

Bronchopulmonary Fistula

Respiratory Arrest

Pneumothorax

Hemothorax

Bronchospasm

Atelectasis

Hemoptysis

### Cardiac

Cardiac Arrhythmia

Congestive Heart Failure

Cardiac Arrhythmia

Myocardial Infarction

Cerebral vascular accident

### Infectious

Fever Requiring Antibiotics

Infection

Pneumonia and Fever

Wound Infection

Infection and Fever

Pneumonia

Supplemental Table 3. Other Procedure Categories

Other Procedure

Cytology (sputum, bronchial, washing/brushing)

Other (biopsy):

Other Lymph Node Biopsy

Other Organ Biopsy

Scalene Node Biopsy

Surgical Open Biopsy

Lymphadenectomy

Bx, lymph node – other

Bx, other – adrenal

Other (no biopsy):

Fluroscopy

CT – brain/head/skull

Bx, other – non-lung cytology

Bx, other non-lung histology

Other – cytology, other

Other – echocardiography

Other – radionucleotide, Fusion PET/CT

Other – radionucleotide, Somatostatin receptor

Other – autopsy

Other – laser resection

Other – pleurectomy

Death Certificate Confirmation

Other (Specify)

Supplemental Table 4. Clinical and procedure characteristics stratified by confirmed pathology (n=3006)

| Characteristic                   | Benign<br>(n=276) | Malignant<br>(n=2730) | P-Value          |
|----------------------------------|-------------------|-----------------------|------------------|
| <b>Clinical Features</b>         |                   |                       |                  |
| °°Age (mean, SD)                 | 64.38 (4.91)      | 64.19 (5.13)          | 0.55             |
| Male                             | 193 (69.9%)       | 1733 (62.7%)          | <b>0.02</b>      |
| BMI (≥30)                        | 53 (19.3%)        | 526 (19.5%)           | <b>0.92</b>      |
| °°Pack Years (mean, SD)          | 55.28 (30.0)      | 62.41 (31.33)         | <b>&lt;0.001</b> |
| Pack Years (≥30)                 | 222(80.4%)        | 2443 (89.5%)          | <b>&lt;0.001</b> |
| <b>Smoking Status</b>            |                   |                       |                  |
| CS                               | 96 (34.8%)        | 1319 (48.3%)          | <b>&lt;0.001</b> |
| FS                               | 180 (65.2%)       | 1411 (51.7%)          |                  |
| <b>Comorbidities</b>             |                   |                       |                  |
| COPD                             | 33 (12.0%)        | 523 (19.2%)           | <b>0.003</b>     |
| History of Myocardial Infarction | 35 (12.7%)        | 397 (13.2%)           | 0.40             |
| Hypertension                     | 79 (28.7%)        | 954 (35.3%)           | <b>0.03</b>      |
| History of Stroke                | 9 (3.3%)          | 100 (3.3%)            | 0.73             |
| Diabetes                         | 18 (6.5%)         | 226 (7.5%)            | 0.31             |
| Liver Disease                    | 13 (4.7%)         | 123 (4.5%)            | 0.88             |
| Any History of Cancer            | 16 (5.8%)         | 166 (6.1%)            | 0.85             |
| DCCI                             | 0.33 (0.67)       | 0.37 (0.62)           | 0.88             |
| <b>Procedure</b>                 |                   |                       |                  |
| Surgical Biopsy                  | 78 (28.3%)        | 1010 (37.0%)          | <b>0.004</b>     |
| Bronchoscopy                     | 108 (39.1%)       | 1560 (57.1%)          | <b>&lt;0.001</b> |
| Needle Biopsy                    | 118 (42.8%)       | 1416 (51.9%)          | <b>0.004</b>     |
| Mediastinoscopy                  | 14 (5.1%)         | 377 (13.8%)           | <b>&lt;0.001</b> |
| Other Procedure                  | 160 (58.7)        | 1599 (58.6%)          | 0.97             |
| °°Procedure category sum         | 1.74 (0.909)      | 2.18 (1.211)          | <b>&lt;0.001</b> |
| <b>Complications</b>             |                   |                       |                  |
| Major                            | 9 (3.3%)          | 146 (5.4%)            | 0.14             |
| Intermediate                     | 34 (12.3%)        | 531 (19.5%)           | <b>0.004</b>     |
| Minor                            | 5 (1.8%)          | 138 (5.1%)            | <b>0.02</b>      |
| Any Complication                 | 38 (13.8%)        | 648 (23.7%)           | <b>&lt;0.001</b> |
| Respiratory                      | 25 (9.1%)         | 428 (15.7%)           | <b>0.003</b>     |
| Cardiac                          | 9 (3.3%)          | 127 (4.7%)            | 0.29             |
| Infectious                       | 7 (2.5%)          | 161 (5.9%)            | <b>0.02</b>      |

\*() Indicates percentage for categorical variables and SD for linear variables.

\*\* Deyo Charleson Comorbidity Index

°°Pooled-t test was employed. For all other variables chi-squared test was applied.
